# Supplementary material for: Comparison of sample preparation methodologies towards optimisation of Raman spectroscopy for peripheral blood mononuclear cells
Source: Royal Society of Chemistry journal article supplement (doi:10.1039/d0ay02040k), 2021-01-01
Supplement: d0ay02040k1.pdf [file d0ay02040k1.pdf]

## SUPPLEMENTARY FIGURES

S1. Pre-processing steps employed on the Raman spectra of B lymphocyte from healthy controls

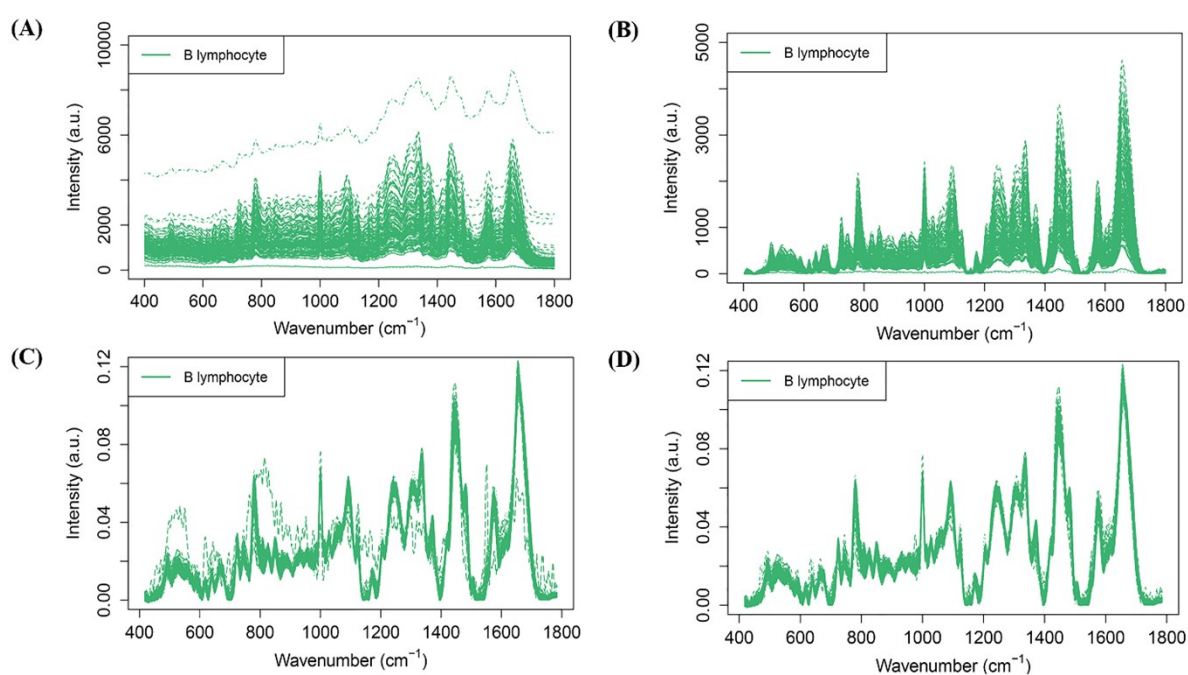

*Supplementary figure 1: Pre-processing steps employed on the Raman spectra of fifty B lymphocyte from healthy controls (n=3). (A) Smoothed Raman spectra using Savitzky-Golay filtration (B) Baseline correction of Raman spectra with polynomial and rubberband , (C) Vector normalization and (D) Grubb's test for removing outlying spectra*
